# Supplementary material for: Spontaneous and Ionizing Radiation-Induced Aggregation of Human Serum Albumin: Dityrosine as a Fluorescent Probe
Source: MDPI journal article supplement (doi:10.3390/ijms23158090), 2022-07-22
Supplement: s1 [file s1]

## Supplementary Materials

Karolina Radomska, Marian Wolszczak \*

\* Correspondence: marian.wolszczak@p.lodz.pl

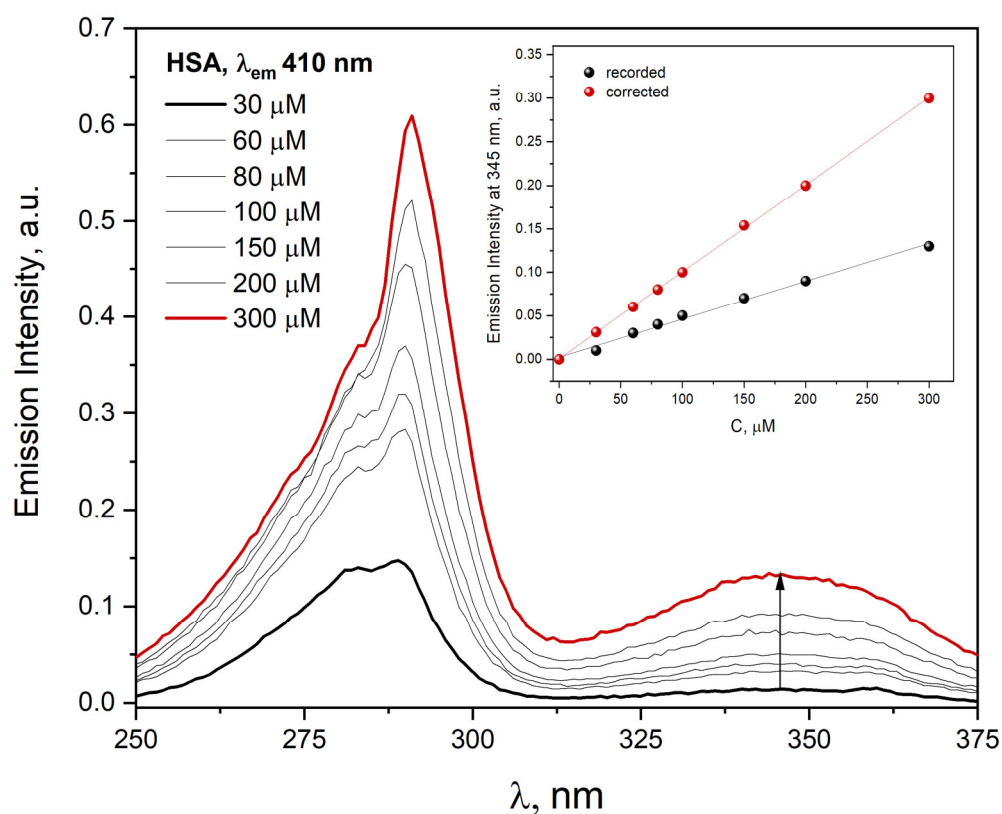

**Figure S1.** Emission excitation spectra of the neat HSA solution (30-300  $\mu$ M). The emission wavelengths were 410. **Insert:** Dependence of  $I_{max}$  as a function of human serum albumin concentration (30–300  $\mu$ M).  $I_{max}$ —intensity of HSA emission in buffer solution at maximum of excitation emission band,  $\lambda_{em}$ =410 nm. The red dots represent the  $I_{max}$  after correction for inner filter effect.

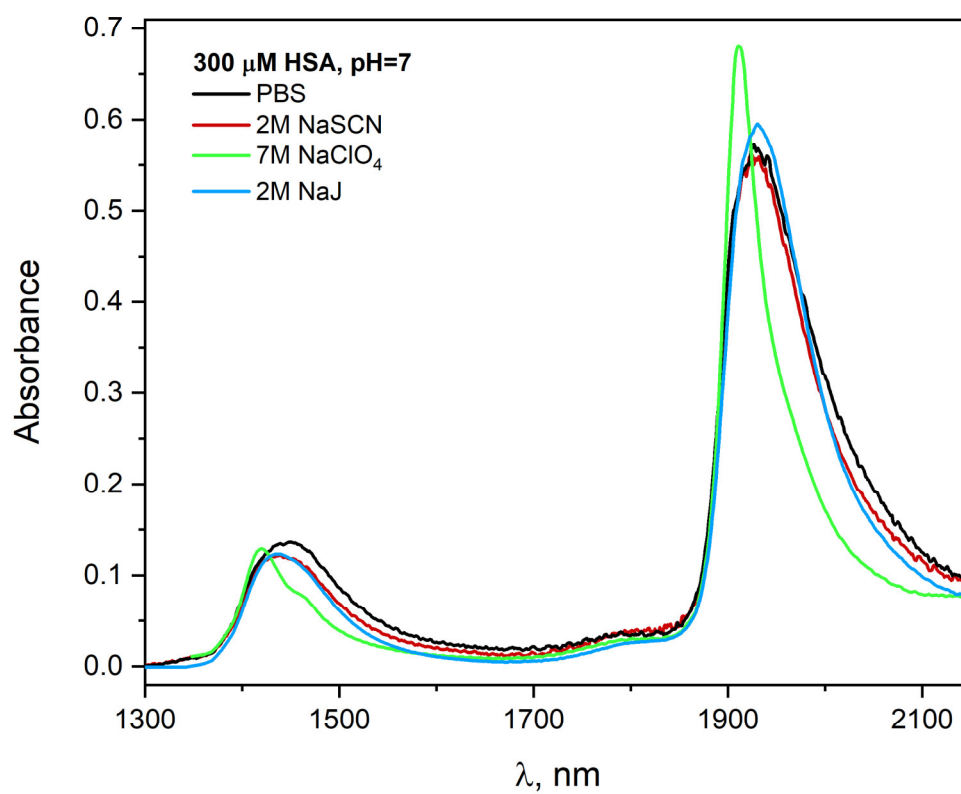

**Figure S2.** Absorption spectra of buffer solution of HSA (300 μM) containing NaSCN (2M), NaClO<sub>4</sub> (7M), NaJ (2M). Measurements were made using a 0.1 mm quartz cuvette. The PBS plot represents the spectra of HSA (300 μM).

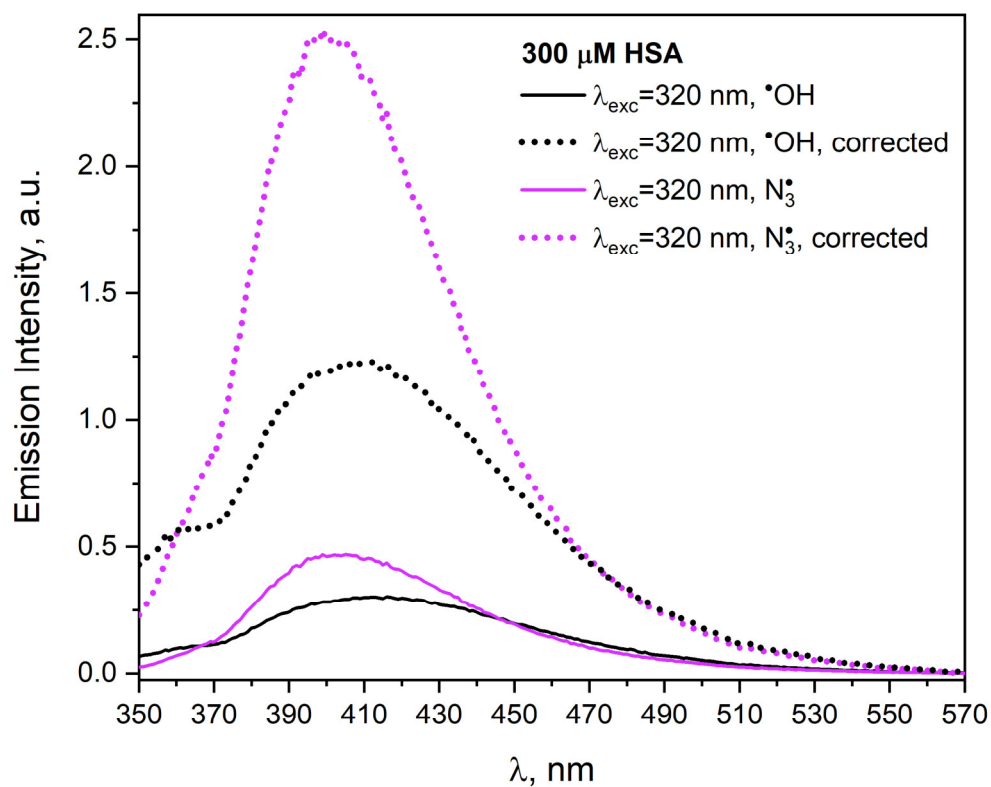

**Figure S3.** Emission spectrum of  $\text{N}_2\text{O}$ -saturated buffer HSA solution ( $300 \mu\text{M}$ ) containing  $\text{NaN}_3$  ( $0.1\text{M}$ ), obtained for irradiation dose  $27.8 \text{ kGy}$  (violet curve). Emission spectrum of  $\text{N}_2\text{O}$ -saturated buffer solution of HSA ( $30 \mu\text{M}$ ), obtained for irradiation dose  $27.8 \text{ kGy}$  (black curve). The excitation wavelength was  $320 \text{ nm}$ . The dotted curves represent the HSA emission spectra after correction for inner filter effect.

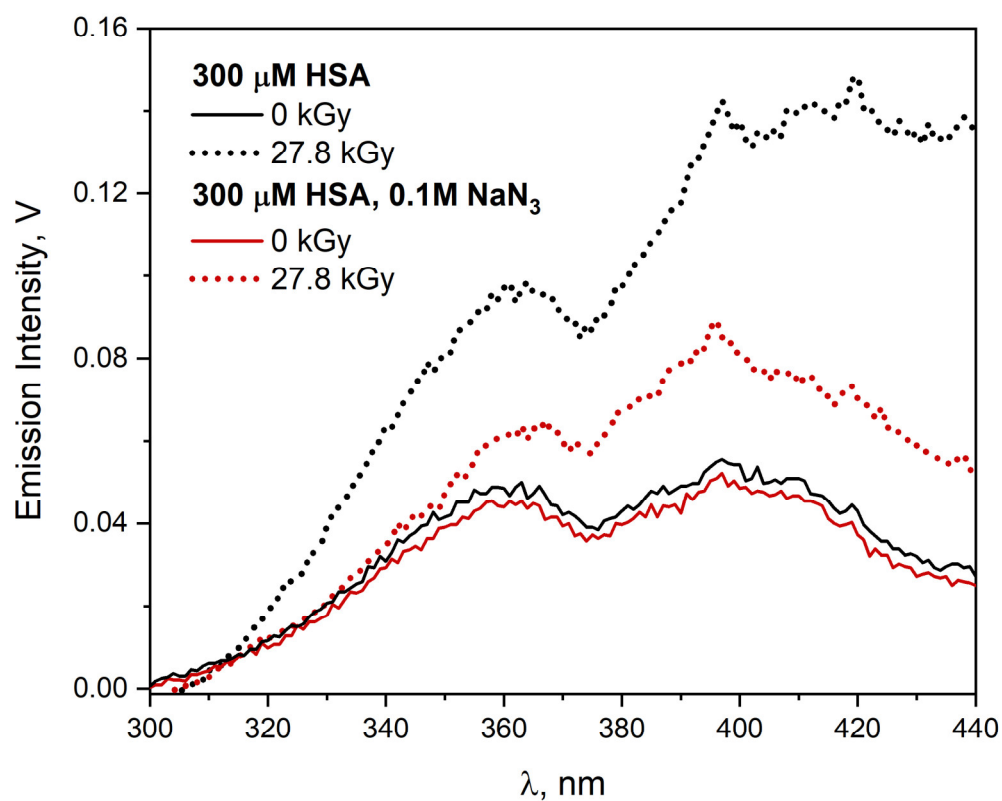

**Figure S4.** Emission excitation spectra of the N<sub>2</sub>O-saturated HSA solutions (300 μM): neat or containing 0.1M NaN<sub>3</sub>, obtained for irradiation dose 27.8 kGy. The emission wavelength was 525 nm.

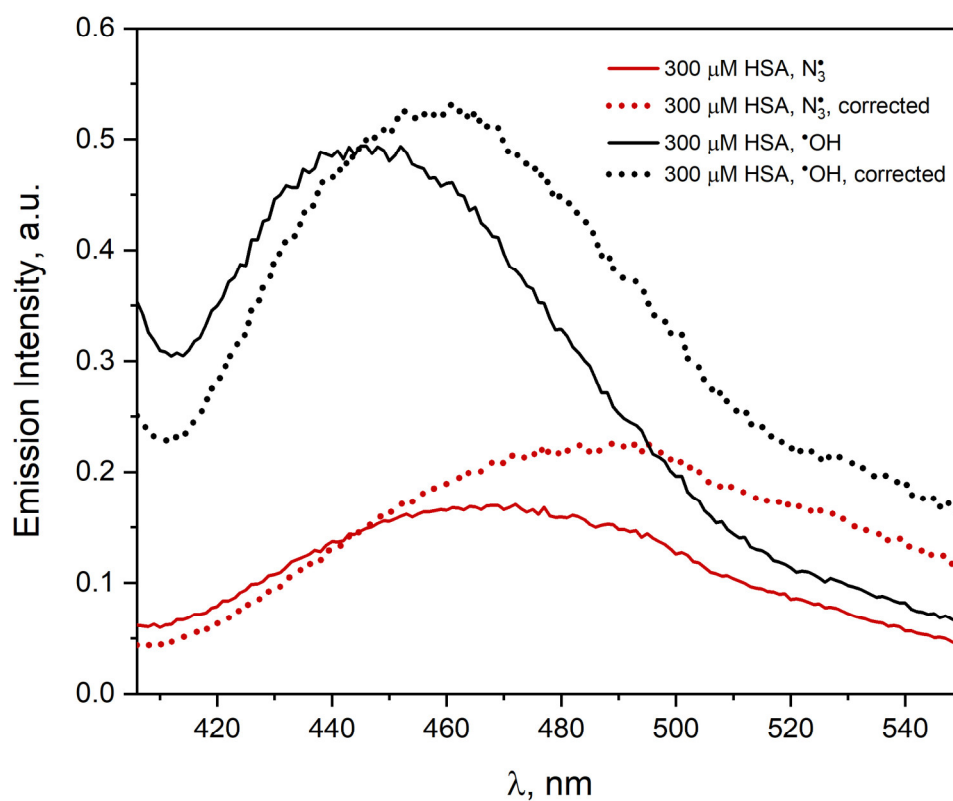

**Figure S5.** Emission spectrum of  $\text{N}_2\text{O}$ -saturated buffer HSA solution ( $300\ \mu\text{M}$ ) containing  $\text{NaN}_3$  ( $0.1\text{M}$ ), obtained for irradiation dose  $27.8\ \text{kGy}$  (red curve). Emission spectrum of  $\text{N}_2\text{O}$ -saturated buffer solution of HSA ( $30\ \mu\text{M}$ ), obtained for irradiation dose  $27.8\ \text{kGy}$  (black curve). The excitation wavelength was  $390\ \text{nm}$ . The dotted curves represent the HSA emission spectra after correction for instrument response (mainly photomultiplier spectral response).

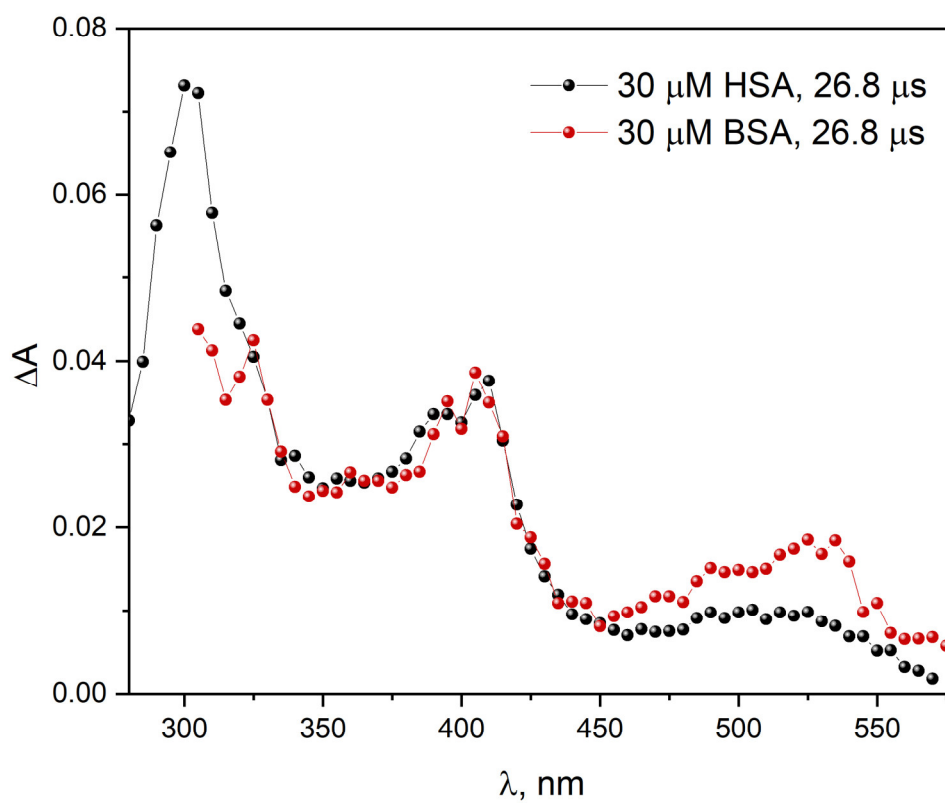

**Figure S6.** Transient absorption spectra recorded at 26.8  $\mu\text{s}$  time after 4 $\mu\text{s}$  pulse irradiation with dose of 800 Gy of  $\text{N}_2\text{O}$ -saturated buffer solutions containing: 30  $\mu\text{M}$  HSA or 30  $\mu\text{M}$  BSA and 0.1M  $\text{NaN}_3$ . Spectra were normalized.

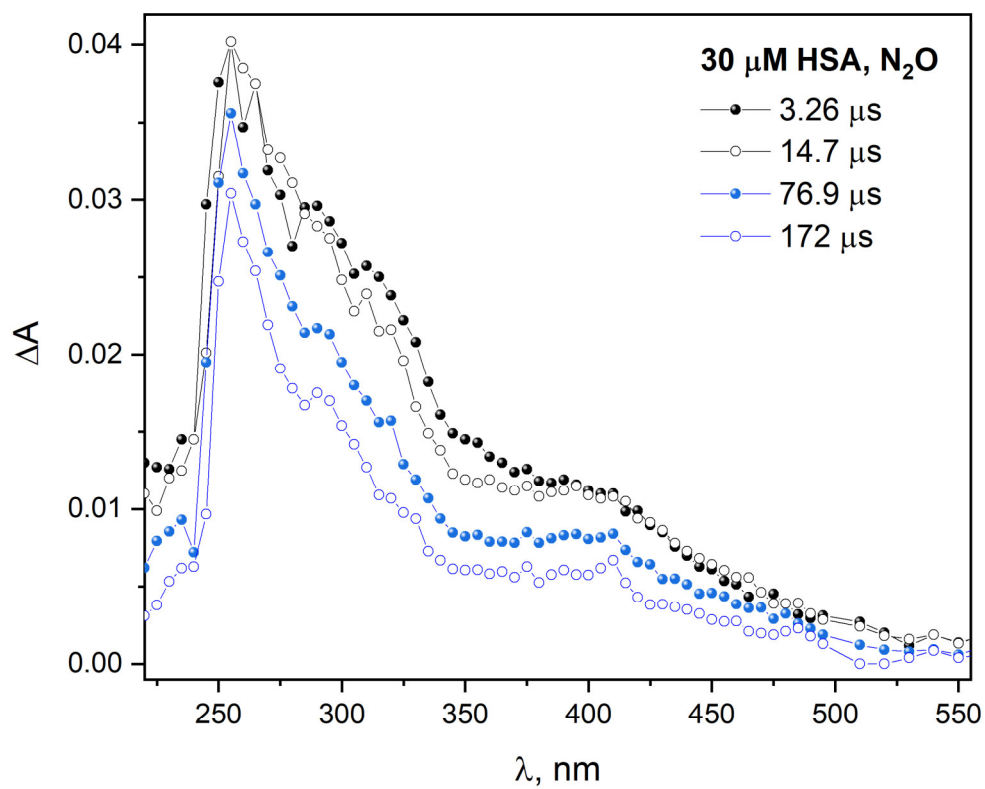

**Figure S7.** Transient absorption spectra recorded at various time after 17 ns pulse irradiation with dose of 55 Gy of  $\text{N}_2\text{O}$ -saturated buffer solutions containing 30  $\mu\text{M}$  HSA.

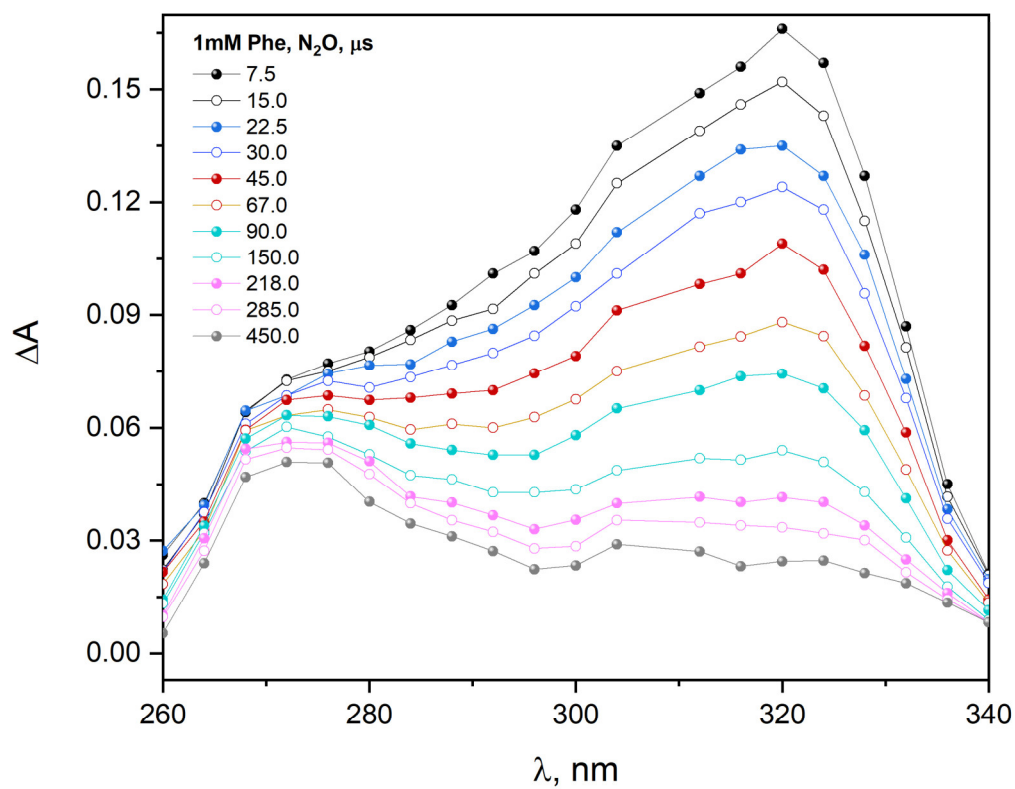

**Figure S8.** Transient absorption spectra recorded at various time after 17 ns pulse irradiation with dose of 55 Gy of  $N_2O$ -saturated buffer solutions containing 1 mM Phe.



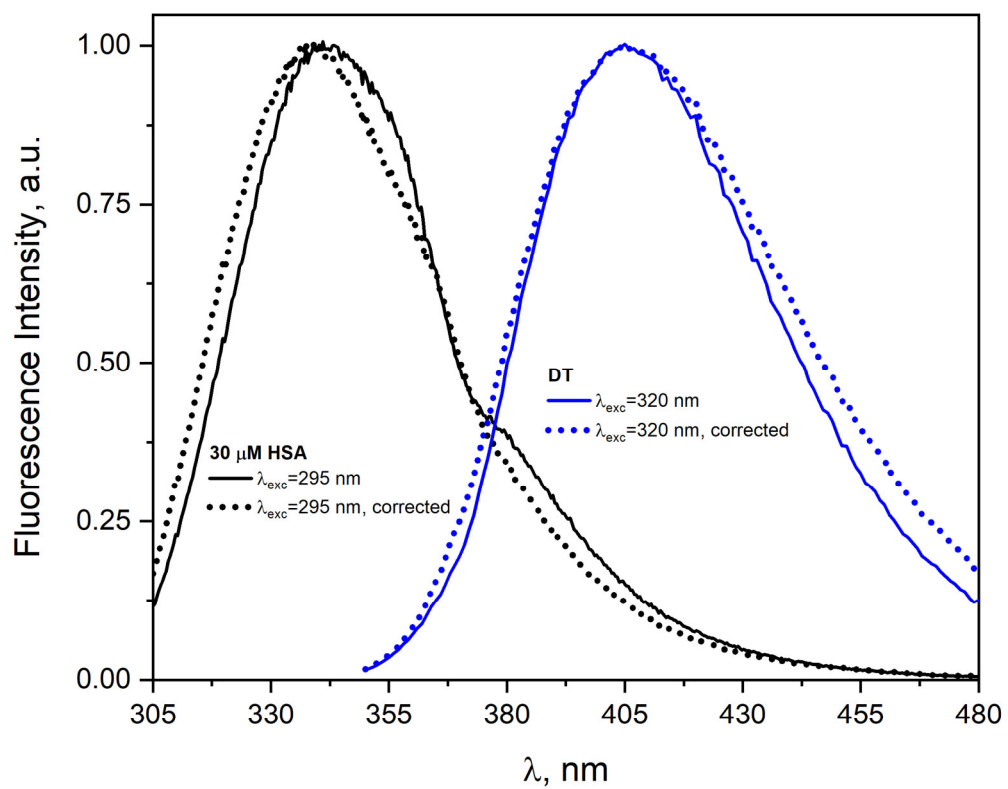

**Figure S9.** Fluorescence spectra of aqueous solutions of HSA (30  $\mu\text{M}$ ),  $\lambda_{\text{exc}} = 295$  nm and DT,  $\lambda_{\text{exc}} = 320$  nm (generated by irradiation, see caption for Figure 12).
